# Supplementary material for: Exclusive Enteral Nutrition Exerts Anti-Inflammatory Effects through Modulating Microbiota, Bile Acid Metabolism, and Immune Activities
Source: MDPI journal article supplement (doi:10.3390/nu14214463), 2022-10-24
Supplement: s1 [file s1]

Supplementary Table S2. EEN-enriched bile acids are natural ligands of various receptors which are distributed on different immune cells.

| Receptors                                                   | Agonists                                    | Antagonists                    | Immune cell distribution                   |
|-------------------------------------------------------------|---------------------------------------------|--------------------------------|--------------------------------------------|
| G-protein bile acid receptor 1 (GPBAR1/Tgr5)                | CA, CDCA, HCA, HDCA, UDCA, bUDCA, 6-ketoLCA |                                | Macrophage                                 |
| Farnesoid-X-Receptor (NR1H4)                                | CA, CDCA                                    | $\alpha$ MCA, $\beta$ MCA, HCA | Macrophage, Dendritic cell                 |
| Vitamin D receptor (NR1H1)                                  | 6-keoto-LCA, 6,7-diketoLCA                  |                                | Macrophage, Dendritic cell                 |
| Retinoic acid-related orphan receptor- $\gamma$ t (NR1F1-3) | 6-keoto-LCA, 6,7-diketoLCA                  |                                | T helper 17, group 3 innate lymphoid cells |

EEN, exclusive enteral nutrition; CA, cholic acid; CDCA, chenodeoxycholic acid; HCA, hyocholic acid; HDCA,  $\alpha$ -hyodeoxycholic acid; UDCA, ursodeoxycholic acid; bUDCA, 3 $\beta$ -ursodeoxycholic acid; 6-ketoLCA, 6-ketolithocholic acid;  $\alpha$ MCA,  $\alpha$ -muricholic acid;  $\beta$ MCA,  $\beta$ -muricholic acid; HCA, hyocholic acid; 6,7-diketoLCA, 6,7-diketolithocholic acid.
