# Supplementary material for: Exclusive Enteral Nutrition Exerts Anti-Inflammatory Effects through Modulating Microbiota, Bile Acid Metabolism, and Immune Activities
Source: MDPI journal article supplement (doi:10.3390/nu14214463), 2022-10-24
Supplement: s1 [file s1]

Supplementary Table S1. Clinical characteristics of PBMC donors with active CD.

|    | <b>Sex</b> | <b>Age</b> | <b>Time of onset</b> | <b>Maintenance treatment</b> |
|----|------------|------------|----------------------|------------------------------|
| P1 | Male       | 16         | 1 year               | Infliximab                   |
| P2 | Male       | 23         | 6 months             | Mesalazine                   |
| P3 | Male       | 23         | 1 years              | Infliximab                   |
| P4 | Male       | 26         | 10 years             | Infliximab, Prednisolone     |
| P5 | Male       | 30         | 4 years              | Infliximab, Mesalazine       |

CD, Crohn's disease; PBMC, peripheral blood mononuclear cell.
