# Supplementary material for: Exclusive Enteral Nutrition Exerts Anti-Inflammatory Effects through Modulating Microbiota, Bile Acid Metabolism, and Immune Activities
Source: Nutrients. 2022 Oct 24;14(21):4463. doi: 10.3390/nu14214463 (PMC9657881; doi:10.3390/nu14214463)
Supplement: Supplementary file 1 [file nutrients-14-04463-s001.zip]

Archive with 5 entries (5 files):
- Figure S1.tif
- Figure S2.tif
- Figure S3.tif
- Supp_Table_S1.pdf
- Supp_Table_S2.pdf
